RESEARCH ARTICLE

# Genetic characterization of *bla*<sub>NDM</sub>-harboring plasmids in carbapenem-resistant *Escherichia coli* from Myanmar

Yo Sugawara<sup>1\*</sup>, Yukihiro Akeda<sup>1,2\*</sup>, Noriko Sakamoto<sup>1</sup>, Dan Takeuchi<sup>1</sup>, Daisuke Motooka<sup>3</sup>, Shota Nakamura<sup>3</sup>, Hideharu Hagiya<sup>2</sup>, Norihisa Yamamoto<sup>2</sup>, Isao Nishi<sup>4</sup>, Hisao Yoshida<sup>2</sup>, Kazuhisa Okada<sup>1</sup>, Khwar Nyo Zin<sup>5</sup>, Mya Mya Aye<sup>6</sup>, Kazunori Tonomo<sup>2</sup>, Shigeyuki Hamada<sup>1</sup>

**1** Thailand–Japan Research Collaboration Center on Emerging and Re-emerging Infections, Research Institute for Microbial Diseases, Osaka University, Suita, Japan, **2** Division of Infection Control and Prevention, Osaka University Hospital, Suita, Japan, **3** Department of Infection Metagenomics, Research Institute for Microbial Diseases, Osaka University, Suita, Japan, **4** Laboratory for Clinical Investigation, Osaka University Hospital, Suita, Japan, **5** Clinical Laboratory Department, Yangon General Hospital, Yangon, Myanmar, **6** Bacteriology Research Division, Department of Medical Research, Yangon, Myanmar

\* [akeda@biken.osaka-u.ac.jp](mailto:akeda@biken.osaka-u.ac.jp) (YA); [y1yo2yo3@biken.osaka-u.ac.jp](mailto:y1yo2yo3@biken.osaka-u.ac.jp) (YS)

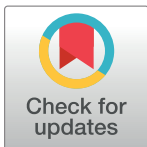

**OPEN ACCESS**

**Citation:** Sugawara Y, Akeda Y, Sakamoto N, Takeuchi D, Motooka D, Nakamura S, et al. (2017) Genetic characterization of *bla*<sub>NDM</sub>-harboring plasmids in carbapenem-resistant *Escherichia coli* from Myanmar. PLoS ONE 12(9): e0184720. <https://doi.org/10.1371/journal.pone.0184720>

**Editor:** Yeng-Tseng Wang, Kaohsiung Medical University, TAIWAN

**Received:** June 7, 2017

**Accepted:** August 29, 2017

**Published:** September 14, 2017

**Copyright:** © 2017 Sugawara et al. This is an open access article distributed under the terms of the [Creative Commons Attribution License](https://creativecommons.org/licenses/by/4.0/), which permits unrestricted use, distribution, and reproduction in any medium, provided the original author and source are credited.

**Data Availability Statement:** The whole genome sequence data are available from the DDBJ database under accession numbers DRX064631 (M105), DRX064632 (M107), DRX064633 (M109), DRX064634 (M110), DRX064635 (M213), DRX064636 (M214), DRX064638 (M216), and DRX064639 (M217). The plasmid sequences are available from the DDBJ database under accession numbers AP018136 (pM105\_FII), AP018137 (pM105\_mF), AP018138 (pM107\_FII), AP018139 (pM109\_FII), AP018140 (pM110\_FII), AP018141 (pM110\_X3), AP018142 (pM213\_X3),

## Abstract

The bacterial enzyme New Delhi metallo-β-lactamase hydrolyzes almost all β-lactam antibiotics, including carbapenems, which are drugs of last resort for severe bacterial infections. The spread of carbapenem-resistant *Enterobacteriaceae* that carry the New Delhi metallo-β-lactamase gene, *bla*<sub>NDM</sub>, poses a serious threat to public health. In this study, we genetically characterized eight carbapenem-resistant *Escherichia coli* isolates from a tertiary care hospital in Yangon, Myanmar. The eight isolates belonged to five multilocus-sequence types and harbored multiple antimicrobial-resistance genes, resulting in resistance against nearly all of the antimicrobial agents tested, except colistin and fosfomycin. Nine plasmids harboring *bla*<sub>NDM</sub> genes were identified from these isolates. Multiple *bla*<sub>NDM</sub> genes were found in the distinct Inc-replicon types of the following plasmids: an IncA/C<sub>2</sub> plasmid harboring *bla*<sub>NDM-1</sub> (*n* = 1), IncX3 plasmids harboring *bla*<sub>NDM-4</sub> (*n* = 2) or *bla*<sub>NDM-7</sub> (*n* = 1), IncFII plasmids harboring *bla*<sub>NDM-4</sub> (*n* = 1) or *bla*<sub>NDM-5</sub> (*n* = 3), and a multireplicon F plasmid harboring *bla*<sub>NDM-5</sub> (*n* = 1). Comparative analysis highlighted the diversity of the *bla*<sub>NDM</sub>-harboring plasmids and their distinct characteristics, which depended on plasmid replicon types. The results indicate circulation of phylogenetically distinct strains of carbapenem-resistant *E. coli* with various plasmids harboring *bla*<sub>NDM</sub> genes in the hospital.

## Introduction

Carbapenems are broad-spectrum antibiotics used as the last line of defense against multi-drug-resistant bacteria; however, infections with carbapenem-resistant *Enterobacteriaceae* (CRE) have been increasingly reported since the early 2000s [1], [2]. CRE are resistant to most commonly prescribed antibiotics; therefore, CRE infections are associated with poor prognosis

AP018143 (pM214\_AC2), AP018144 (pM214\_FII), AP018145 (pM216\_AC2), AP018146 (pM216\_X3), and AP018147 (pM217\_FII).

**Funding:** This study was supported by the Japan Initiative for Global Research Network on Infectious Diseases (J-GRID) from Ministry of Education, Culture, Sport, Science and Technology in Japan (MEXT), and Japan Agency for Medical Research and Development (AMED, URL: <http://www.amed.go.jp/en/>). The funder had no role in study design, data collection and analysis, decision to publish, or preparation of the manuscript.

**Competing interests:** The authors have declared that no competing interests exist.

and pose a serious threat in clinical settings [3]. Carbapenem resistance in *Enterobacteriaceae* is primarily due to carbapenemases; plasmid-borne  $\beta$ -lactamases that hydrolyze carbapenems [4]. Several types of carbapenemases, such as KPC, OXA-48, VIM, IMP, and New Delhi metallo- $\beta$ -lactamase (NDM), have been identified worldwide [5].

Routine worldwide surveillance is essential to understand and prevent CRE transmission; however, in many countries, including Myanmar, surveillance is limited or non-existent. Recently, Myat *et al.* reported the isolation of three *Escherichia coli* and three *Klebsiella pneumoniae* strains harboring bla<sub>NDM</sub> genes in a screening of 592 blood cultures in three hospitals in Yangon, Myanmar [6]. No other carbapenemase-encoding genes were identified in their study, suggesting that NDM rather than other carbapenemases is prevalent in Myanmar. The bla<sub>NDM</sub> genes are usually located adjacent to or in between mobile genetic elements, including transposons and insertion sequences, which facilitate transposition between replicons [7], [8]. Accordingly, bla<sub>NDM</sub> genes are currently found in an array of plasmid replicon types, such as IncF, IncX3, IncL/M, and IncH, as well as in plasmids with a broad-host-range, including IncA/C<sub>2</sub>. Consequently, the bla<sub>NDM</sub> gene has spread from the putative original reservoir, *Acinetobacter*, to enteric bacteria [9]. Additionally, accumulation of nucleotide substitutions in bla<sub>NDM</sub> has produced several variants from the originally identified enzyme NDM-1 [10]. Organisms harboring bla<sub>NDM</sub> genes have been detected not only in hospitals, but also in the environment in some Asian countries [11], [12]. Therefore, it is necessary to characterize the bacterial host, the bla<sub>NDM</sub>-harboring plasmid, and the genetic environment associated with bla<sub>NDM</sub> in order to understand the gene acquisition mechanism, track its spread, and investigate possible preventive measures [9].

In this study, we genetically characterized eight carbapenem-resistant *E. coli* isolates from a tertiary care hospital in Yangon, Myanmar, using whole-genome sequencing (WGS). Comparative analysis highlighted the diversity of nine plasmids carrying bla<sub>NDM</sub>, providing insight into an evolutionary relationship with the already identified bla<sub>NDM</sub> plasmids.

## Materials and methods

### Bacterial isolates

*E. coli* isolates were obtained from clinical blood or urine specimens collected from patients at Yangon General Hospital, Yangon, Myanmar, from April to August 2015. Ethical approval for the collection of patient specimens was obtained from the Ethics Committee of Osaka University Graduate School of Medicine and the Department of Medical Research, Myanmar, with a waiver of informed consent. All samples were anonymized before analysis. Specimens were cultured on blood agar plates at 37°C overnight, and each single colony formed was subjected to species identification and antimicrobial-susceptibility testing using a VITEK2 automated system (Sysmex bioMérieux, Marcy l'Etoile, France). *Enterobacteriaceae* strains with minimum inhibitory concentration (MIC) > 2  $\mu$ g/mL for meropenem were collected and stored at -80°C in phosphate-buffered saline supplemented with 25% glycerol. Isolates were also grown on M-ECC [13], CHROMagar ECC (CHROMagar Microbiology, Paris, France) supplemented with 0.25  $\mu$ g/mL meropenem and 70  $\mu$ g/mL ZnSO<sub>4</sub>, and analyzed using an API 20E system (Sysmex bioMérieux) and an EIKEN dry plate (Eiken Chemical, Tokyo, Japan) to reconfirm species identity and antimicrobial susceptibility.

### WGS analysis

Isolates were subjected to WGS using PacBio RSII (Pacific Biosciences, Menlo Park, CA, USA) and MiSeq systems (Illumina, San Diego, CA, USA). To prepare genomic DNA, bacterial

isolates were cultured overnight in brain-heart-infusion broth (BD Bacto, Franklin Lakes, NJ, USA) supplemented with 0.25 µg/mL meropenem, and DNA was isolated using a PowerSoil DNA isolation kit (MoBio Laboratories, Carlsbad, CA, USA). To prepare libraries for PacBio RSII, 10 µg DNA was sheared using g-TUBE (Covaris, Woburn, MA, USA) to obtain 10,000–20,000-bp fragments, which were ligated to SMRTbell adapters (Pacific Biosciences). The fragments were processed with a DNA template prep kit 1.0 and a DNA/polymerase binding kit (P6v2; Pacific Biosciences) according to manufacturer's instructions. Then, the fragments were sequenced with a DNA sequencing kit C4 (Pacific Biosciences), and the sequence reads were assembled *de novo* using HGAP version 2.1.0 with default parameters [14]. The sequences were submitted to the DDBJ/Genbank/EMBL database under accession numbers DRX064631 (M105), DRX064632 (M107), DRX064633 (M109), DRX064634 (M110), DRX064635 (M213), DRX064636 (M214), DRX064638 (M216), and DRX064639 (M217). To prepare libraries for MiSeq analysis, 200 ng of genomic DNA was sheared using Covaris S220 (Covaris) and processed with KAPA library preparation kits (KAPA Biosystems, Boston, MA, USA). Paired-end sequencing with 250-bp reads was performed using a MiSeq version 2 500 cycle kit (Illumina). Reads were mapped to the sequence generated from PacBio RSII using mapping software in CLC Genomics Workbench version 7.5 (CLC Bio, Aarhus, Denmark), and the consensus sequence was extracted for further analysis. The plasmid sequences were submitted to the DDBJ/Genbank/EMBL database under accession numbers AP018136 (pM105\_FII), AP018137 (pM105\_mF), AP018138 (pM107\_FII), AP018139 (pM109\_FII), AP018140 (pM110\_FII), AP018141 (pM110\_X3), AP018142 (pM213\_X3), AP018143 (pM214\_AC<sub>2</sub>), AP018144 (pM214\_FII), AP018145 (pM216\_AC<sub>2</sub>), AP018146 (pM216\_X3), and AP018147 (pM217\_FII).

A phylogenetic tree of the *E. coli* isolates based on single-nucleotide polymorphisms (SNPs) was constructed using CSI Phylogeny 1.3 [15]. Multilocus-sequence typing, plasmid-replicon typing, and identification of resistance genes were carried out using MLST 1.8 [16], PlasmidFinder 1.3 [17], and ResFinder 2.1 [18], respectively. Genomic sequences were annotated with RASTtk [19] and MiGAP [20], and genetic structure was compared in EasyFig [21]. A maximum-likelihood tree for IncFII plasmids was constructed using MEGA7 [22].

## Bacterial conjugation and transformation

All bla<sub>NDM</sub>-harboring plasmids identified in this study were transferred to laboratory strains by conjugation or transformation and the presence of bla<sub>NDM</sub> and the plasmid-replicon type was confirmed by PCR [23–25].

Bacterial conjugation was carried out as described previously [26], with some modifications. Luria-Bertani (LB) broth cultures of *E. coli* isolates in the early exponential phase were mixed with the recipient strain, *E. coli* ML4909 [27], at a 1:10 ratio. The bacterial mixture was pelleted by centrifugation, transferred onto nitrocellulose membranes on an LB agar plate, and incubated at 37°C for 6 h. Transconjugants were selected on the LB plate supplemented with 2 µg/mL meropenem and 100 µg/mL rifampicin.

For transformation, plasmids were extracted from overnight cultures of the isolates using the Plasmid Midi kit (Qiagen, Hilden, Germany). HST08 (Takara Bio, Shiga, Japan), a derivative of *E. coli* K12, was electroporated with the extracted plasmids using a Gene Pulser Xcell System (Bio-Rad, Hercules, CA, USA), and transformants were selected on brain-heart-infusion agar (BD Bacto) supplemented with 0.25 µg/mL meropenem.

## Results and discussion

### Characterization of carbapenem-resistant *E. coli*

Carbapenem-resistant *E. coli* strains ( $n = 8$ ) were isolated at Yangon General Hospital, Yangon, Myanmar, from April to August 2015. Patients that tested positive for carbapenem-resistant *E. coli* were admitted to the following wards: hematology ( $n = 5$ ), surgery ( $n = 2$ ), and physical medicine ( $n = 1$ ). Six isolates were obtained from blood specimens derived from patients in the hematology (M105, M109, M110, M214, and M217) and physical medicine (M107) wards, and two were isolated from urine derived from patients in the surgery ward (M213 and M216). All eight isolates were non-susceptible to not only  $\beta$ -lactams, including carbapenems, but also most other antibiotics tested, including aminoglycoside, quinolone, and chloramphenicol (Table 1). Interestingly, isolates from urine were highly resistant to chloramphenicol (MIC > 128), unlike isolates from blood (MIC: 8–32). Colistin appeared to be the only drug effective against all of the isolates examined, with fosfomycin representing a viable alternative for all strains, except for M110 (MIC: 16). By database searches using ResFinder and PlasmidFinder, all isolates were found to carry different types of plasmids encoding several antimicrobial-resistance determinants, including  $\beta$ -lactamases, supporting their multidrug-resistance phenotype (Fig 1B and S1 Table). Phylogenetic analysis based on genome-wide SNPs showed that the isolates belong to different previously defined phylogroups [28], with some belonging to pathogenic phylogroups D and F and others belonging to the commensal and less virulent phylogroups A and B1 (Fig 1A). The isolates were further classified into five multilocus-sequence types; no predominant sequence types were found (Fig 1B). Notably, the five isolates from the hematology ward are not closely related genetically, except for M105 and M109, indicating that different resistant strains disseminated in the ward. M105 and M109 differ in the types of NDM and bla<sub>NDM</sub>-harboring plasmid (Fig 1B), suggesting that they had acquired the plasmids independently. This is in contrast to clonal expansion of other drug-resistant

**Table 1. MICs of antimicrobial agents for *E. coli* clinical isolates from Myanmar.**

| Antimicrobial                 | MICs ( $\mu\text{g/ml}$ ) for strain: |             |             |             |          |          |          |          |
|-------------------------------|---------------------------------------|-------------|-------------|-------------|----------|----------|----------|----------|
|                               | M105                                  | M107        | M109        | M110        | M213     | M214     | M216     | M217     |
| Meropenem                     | 8                                     | 4           | 8           | 4           | >16      | >16      | 8        | 8        |
| Doripenem                     | 8                                     | 2           | 4           | 4           | >16      | >16      | >16      | 8        |
| Imipenem                      | 4                                     | 2           | 4           | 4           | 8        | >16      | >16      | 8        |
| Ceftazidime                   | >64                                   | >64         | >64         | >64         | >64      | >64      | >64      | >64      |
| Cefmetazole                   | >32                                   | >32         | >32         | >32         | >32      | >32      | >32      | >32      |
| Ampicillin/SBT <sup>a</sup>   | >64/128                               | >64/128     | >64/128     | >64/128     | >64/128  | >64/128  | >64/128  | >64/128  |
| Piperacillin/TAZ <sup>a</sup> | >4/512                                | >4/512      | >4/512      | >4/512      | >4/512   | >4/512   | >4/512   | >4/512   |
| Aztreonam                     | 8                                     | >32         | >32         | >32         | >32      | 32       | >32      | 32       |
| Gentamicin                    | >8                                    | >8          | >8          | >8          | >8       | >8       | >8       | >8       |
| Amikacin                      | >32                                   | >32         | >32         | $\leq 4$    | >32      | >32      | >32      | >32      |
| Ciprofloxacin                 | >2                                    | >2          | >2          | >2          | >2       | >2       | >2       | >2       |
| Levofloxacin                  | >4                                    | >4          | >4          | >4          | >4       | >4       | >4       | >4       |
| Chloramphenicol               | 32                                    | 8           | 16          | 16          | >128     | 16       | >128     | 16       |
| Minocycline                   | >8                                    | >8          | >8          | >8          | >8       | >8       | >8       | 2        |
| ST <sup>a</sup>               | >2/38                                 | >2/38       | >2/38       | $\leq 2/38$ | >2/38    | >2/38    | >2/38    | >2/38    |
| Colistin                      | $\leq 0.25$                           | $\leq 0.25$ | $\leq 0.25$ | 0.5         | 0.5      | 1        | 0.5      | 0.5      |
| Fosfomycin                    | $\leq 4$                              | $\leq 4$    | $\leq 4$    | 16          | $\leq 4$ | $\leq 4$ | $\leq 4$ | $\leq 4$ |

<sup>a</sup> SBT; Sulbactam, TAZ; Tazobactam, ST; Sulfamethoxazole/Trimethoprim

<https://doi.org/10.1371/journal.pone.0184720.t001>

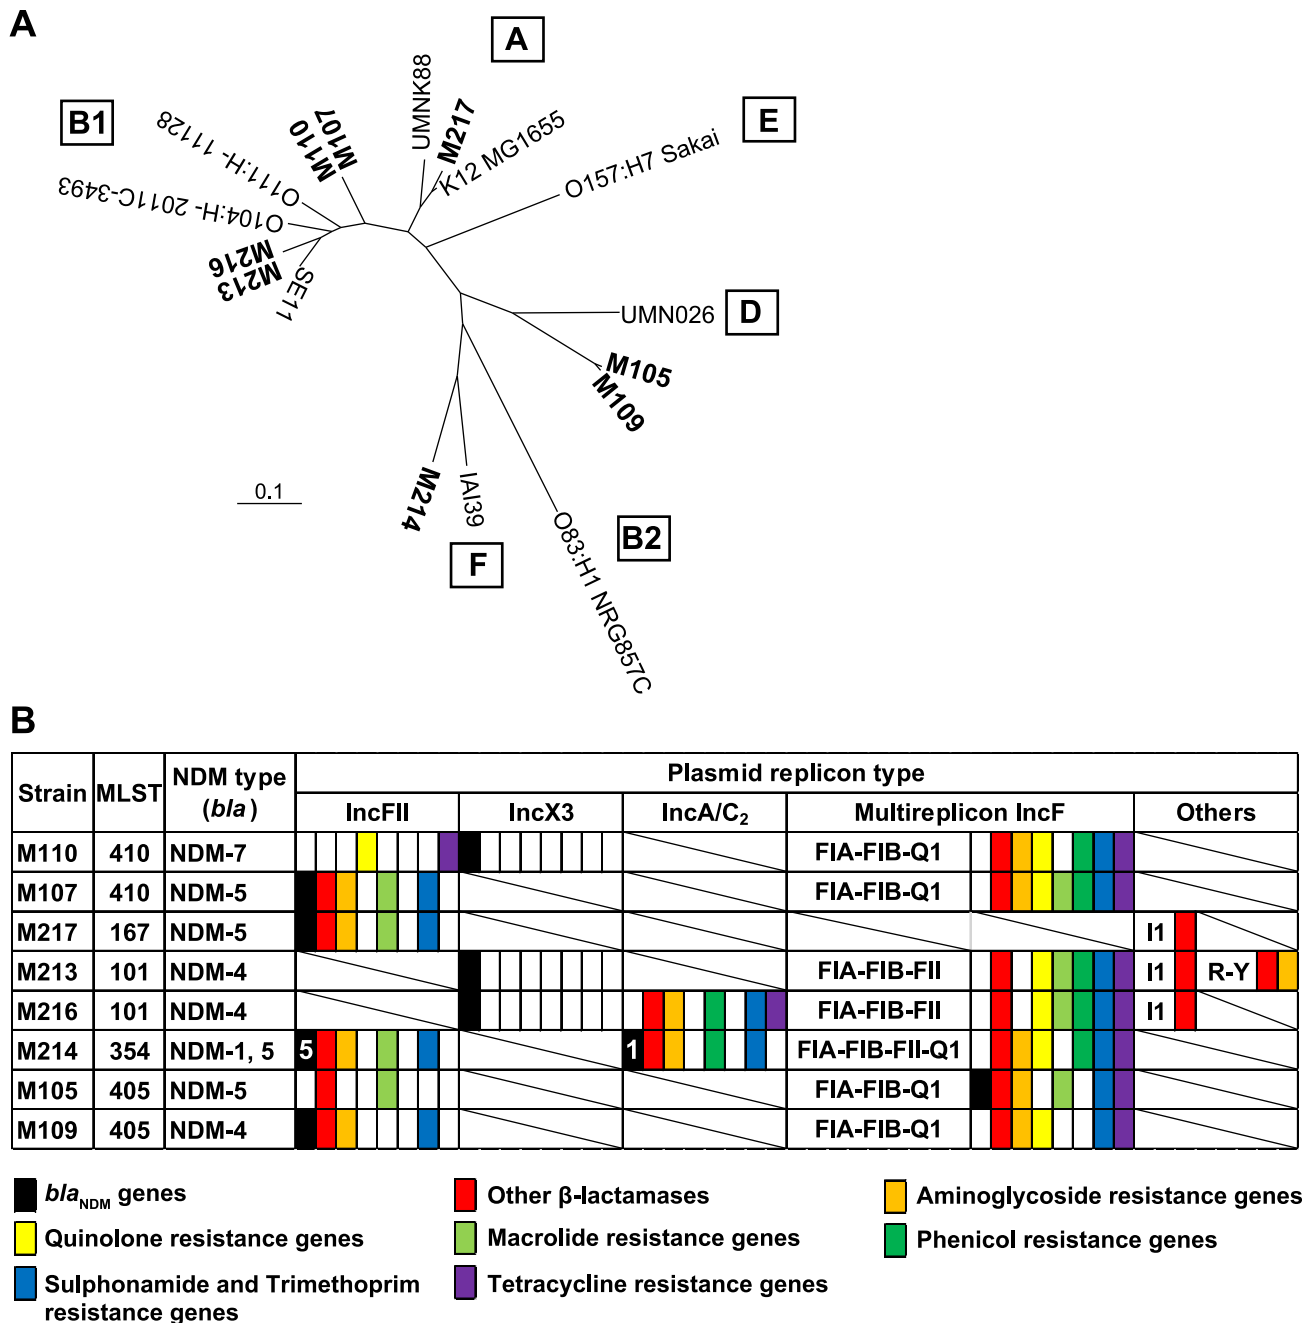

**Fig 1. Phylogeny of carbapenem-resistant *E. coli* isolated in Myanmar and features of their *bla*<sub>NDM</sub>-harboring plasmids.** (A) Phylogenetic tree of carbapenem-resistant *E. coli* isolates based on WGS. Reference genomes and several other available genomes were included for comparison. Phylogroups of the reference strains are indicated in boxes. (B) Multilocus-sequence types, NDM types, plasmid-replicon types, and antimicrobial-resistance profiles determined by database search. In strain M214, NDM types are indicated by numbers on black-shaded boxes.

<https://doi.org/10.1371/journal.pone.0184720.g001>

bacteria, such as methicillin-resistant *Staphylococcus aureus*, that cause nosocomial infections. A database search with WGS and Sanger-sequencing sequence data indicated that the isolates harbor different *bla*<sub>NDM</sub> variants (*bla*<sub>NDM-1</sub>, *bla*<sub>NDM-4</sub>, *bla*<sub>NDM-5</sub>, and *bla*<sub>NDM-7</sub>) (Fig 1B) carried by nine distinct plasmids, of which eight belong to the known replicon types IncA/C<sub>2</sub>

(*n* = 1), IncX3 (*n* = 3), and IncFII (*n* = 4). The remaining plasmid is comprised of replication genes of three replicon types (IncFIA, FIB, and Q1). Additionally, isolate M214 harbors two different types of *bla*<sub>NDM</sub>-carrying plasmids (IncFII and A/C<sub>2</sub>).

### IncA/C<sub>2</sub> plasmids

IncA/C<sub>2</sub> plasmids are broad-host-range plasmids that are predominantly found among NDM-1 producers [29,30]. Indeed, a plasmid we designated as pM214\_A/C<sub>2</sub> represents an IncA/C<sub>2</sub> plasmid harboring *bla*<sub>NDM-1</sub> (Fig 2A). A BLAST search indicated that pM214\_A/C<sub>2</sub> shares the highest degree of similarity with pNDM-1\_Dok01 (GenBank accession no. AP012208.1), a *bla*<sub>NDM-1</sub> plasmid isolated from a clinical *E. coli* isolate in Japan, but of Indian origin, with 99% identity and 93% query coverage [31]. Both plasmids encode *bla*<sub>NDM-1</sub> in the ARI-A region, a resistance island designated for IncA/C<sub>2</sub> [32]; however, the gene clusters containing *bla*<sub>NDM-1</sub> are inverted between the two plasmids. In pM214\_A/C<sub>2</sub>, the resistance island consists of two parts: an IS*Aba125*-mediated composite transposon (Tn125) and a Tn1548-like transposon. The former region, which harbors *bla*<sub>NDM-1</sub>, completely matches that in pNDM-BJ01 (GenBank accession no. JQ001791.1) (Fig 2B), which was isolated from a clinical isolate of

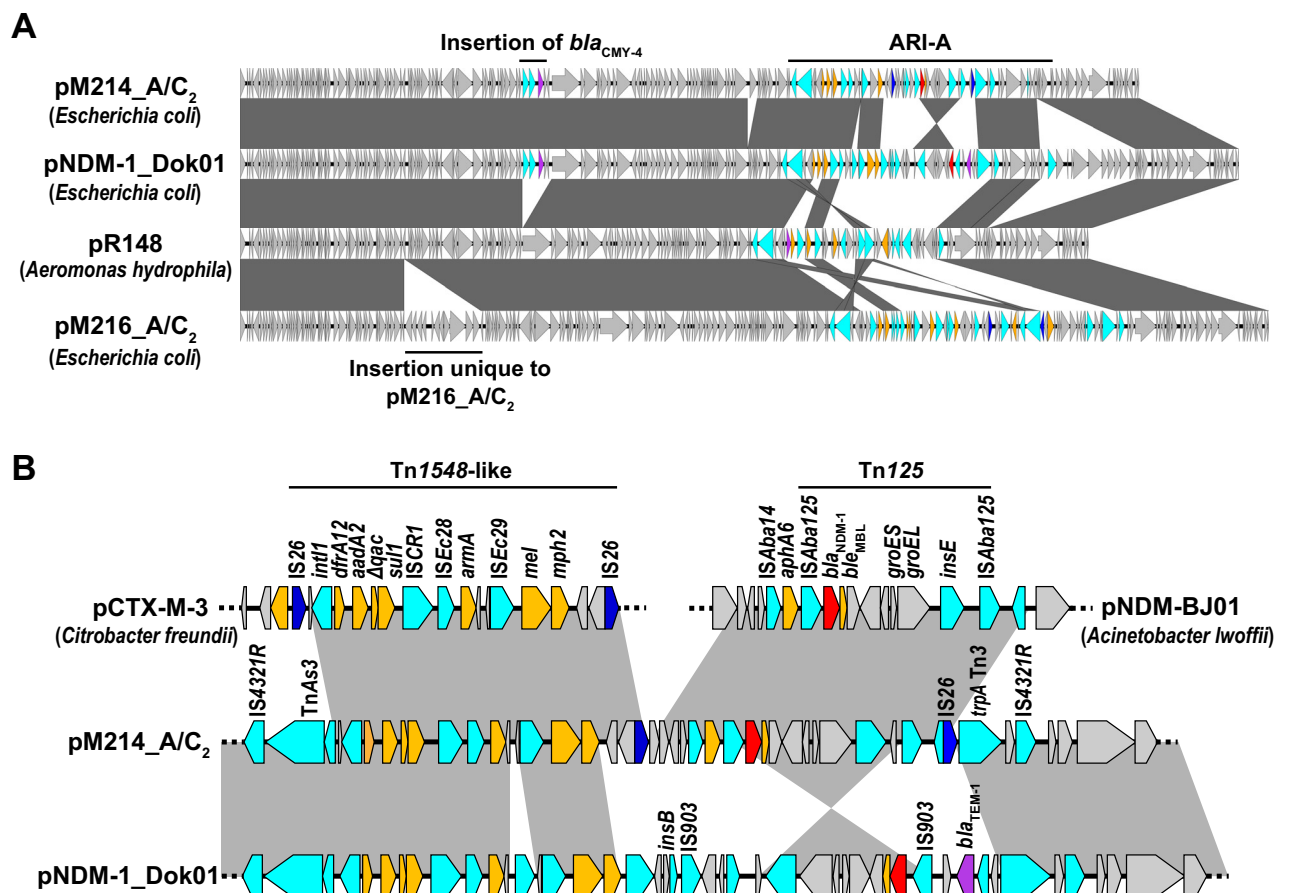

**Fig 2. IncA/C<sub>2</sub> plasmids harboring *bla*<sub>NDM-1</sub>.** (A) Comparison of IncA/C<sub>2</sub> plasmids isolated in this study with similar and/or putative backbone plasmids pNDM-1\_Dok01 and pR148. Homologous regions are shaded dark gray. Genes are indicated in colors as follows: *bla*<sub>NDM-1</sub>, red; other β-lactamases, purple; other antimicrobial-resistance genes, orange; IS26, blue; other mobile genetic elements, cyan; other accessory genes, light gray. The origins of the indicated plasmids are shown in parentheses. pM214\_A/C<sub>2</sub> and pNDM-1\_Dok01 harbor the class C β-lactamase gene, *bla*<sub>CMY-4</sub>. (B) Schematic representation of the genetic context of *bla*<sub>NDM-1</sub> in pM214\_A/C<sub>2</sub> and in other plasmids.

<https://doi.org/10.1371/journal.pone.0184720.g002>

*Acinetobacter lwoffii* [33]. Notably, Tn125 is often detected in *Acinetobacter*; however, the intact form of this transposon has never been found in *Enterobacteriaceae* [34]. This gene cluster is bracketed by IS26-insertion sequences in pM214\_A/C<sub>2</sub>, suggesting that the plasmid acquired bla<sub>NDM-1</sub> from pNDM-BJ01 or a closely related plasmid via a single IS26-mediated gene transfer. Additionally, the Tn1548-like transposon is located adjacent to Tn125 (Fig 2B). This 15,525-bp fragment contains a class 1 integron comprising several antimicrobial-resistance genes and is identical to an unrelated plasmid (pCTX-M-3, GenBank accession no. AF550415.2) [35], except for one nucleotide. This cluster is partially conserved in other IncA/C<sub>2</sub> plasmids, such as pNDM-1\_Dok01 and pM216\_A/C<sub>2</sub>, isolated from strain M216. Therefore, a Tn1548-like transposon might have contributed to the ARI-A island in the putative ancestor of these plasmids, with prototypic features being well conserved in pM214\_A/C<sub>2</sub>. However, pM216\_A/C<sub>2</sub> encodes neither bla<sub>NDM-1</sub> nor bla<sub>CMY-4</sub>, both of which are present in pM214\_A/C<sub>2</sub>, but not in the putative precursor plasmid pR148 (GenBank accession no. JX141473.1) [36]. Moreover, the gene array in the ARI-A resistance island significantly differs from that in pM214\_A/C<sub>2</sub> (Fig 2A), suggesting that these two plasmids were derived from different precursors.

### IncX3 plasmids

We detected three IncX3 plasmids encoding NDM variants: the bla<sub>NDM-4</sub>-harboring plasmids pM213\_X3 and pM216\_X3 and the bla<sub>NDM-7</sub>-harboring plasmid pM110\_X3. The three plasmids are highly similar to previously reported IncX3 plasmids: the bla<sub>NDM-4</sub>-harboring plasmid pJEG027 (GenBank accession no. KM400601.1) [37], the bla<sub>NDM-5</sub>-harboring plasmid pNDM\_MGR194 (KF220657.1) [38], and the bla<sub>NDM-7</sub>-harboring plasmids pKpN01-NDM7 (CP012990.1) [39] and pOM26-1 (KP776609.1), suggesting they share a common ancestor (Fig 3A and 3B). Notably, pJEG027 was isolated from a *K. pneumoniae* isolate from an Australian patient hospitalized in Myanmar before returning to Australia [37]. In these IncX3 plasmids, the bla<sub>NDM</sub> genes are encoded in three distinct structures with various lengths of upstream insertion sequences as shown in Fig 3A. Additionally, all of the plasmids found in the survey lack a 92-bp fragment upstream of *taxD* as compared with pJEG027 and pNDM\_MGR194 (Fig 3A, arrow) and as previously observed in the bla<sub>NDM-7</sub> plasmids pKpN01-NDM7 and pOM26-1 [37]. The IncX3 plasmids do not carry antimicrobial-resistance genes other than bla<sub>NDM</sub> and apparently represent early steps in the evolution and spread of the bla<sub>NDM</sub> gene [38]. Nonetheless, these plasmids encode distinct NDM variants. Therefore, it is likely that bla<sub>NDM</sub> variants have evolved via nucleotide substitutions within the IncX3 plasmid [37], [39]. This process might be driven by selection for stronger resistance, given that NDM-4, -5, and -7 exhibit higher  $\beta$ -lactamase activity than does NDM-1 [40–42].

### IncFII plasmids

IncFII was the most predominant type of bla<sub>NDM</sub>-harboring plasmid in the isolates investigated. Here, we isolated the bla<sub>NDM-4</sub>-harboring plasmid pM109\_FII and the bla<sub>NDM-5</sub>-harboring plasmids pM107\_FII, pM214\_FII, and pM217\_FII (Fig 4A). In contrast to IncX3 plasmids, these plasmids carry other  $\beta$ -lactamases, as well as resistance genes against several antibiotics, including aminoglycosides, macrolides, sulphonamides, and trimethoprim. The overall genetic structure of these plasmids resembles that of known bla<sub>NDM</sub> IncFII plasmids, such as pGUE-NDM (GenBank accession no. JQ364967.1) [43], pMC-NDM (HG003695.1) [44], and pCC1409-1 (KT725789.1)/pCC1410-1 (KT725788.1) [45], which were found in clinical isolates originating from India, Congo, and United Arab Emirates, respectively. Nevertheless, the genetic structure of the IncFII plasmids is relatively diverse as compared to those of IncX3

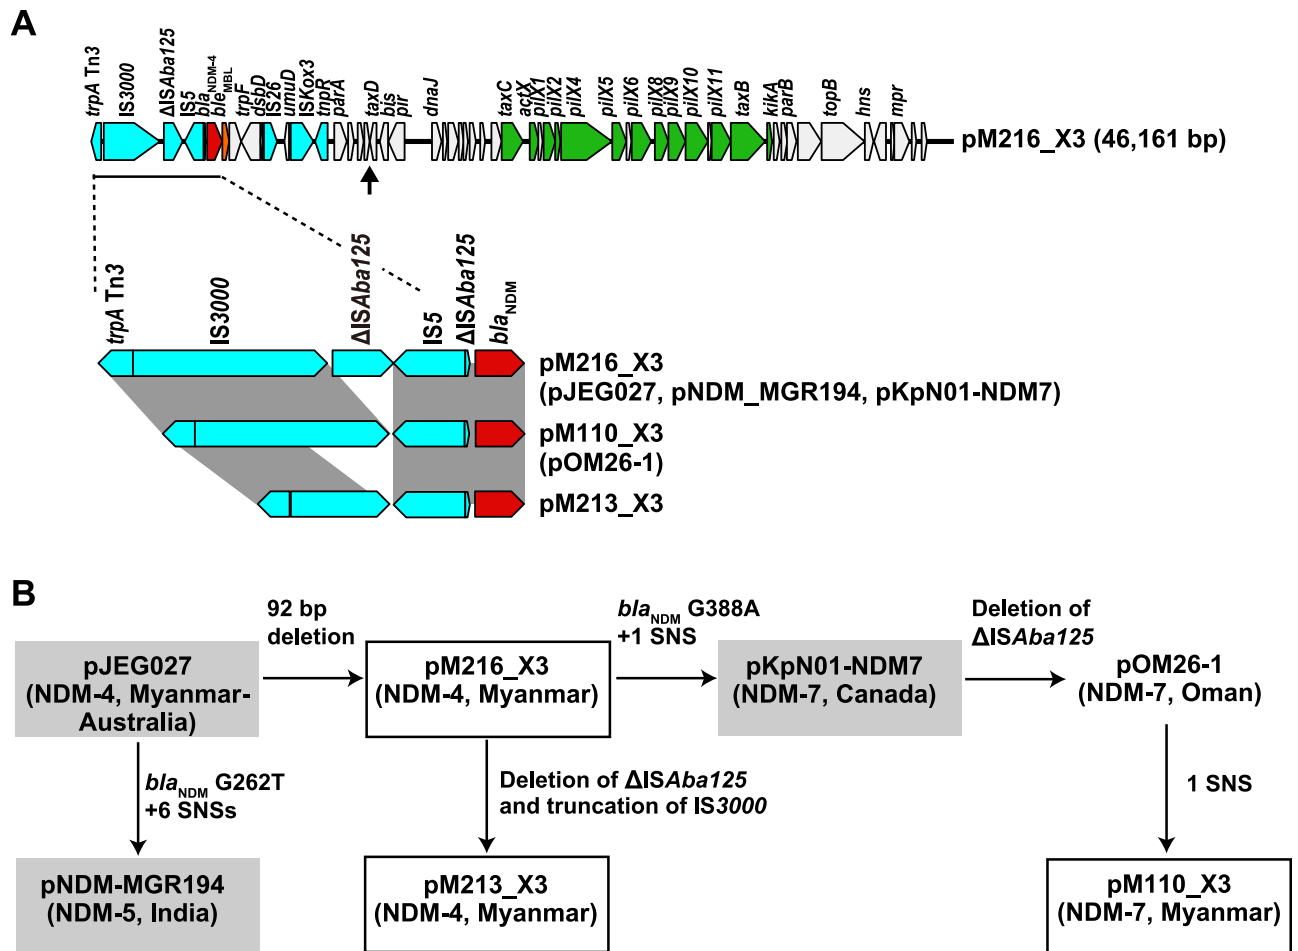

**Fig 3. IncX3 plasmids harboring *bla*<sub>NDM</sub>.** (A) Schematic representation of the *bla*<sub>NDM-4</sub> plasmid pM216\_X3 and comparison of the genetic context of *bla*<sub>NDM</sub> in IncX3 plasmids. Genes are indicated in colors as defined in Fig 2, except that genes involved in conjugal transfer are depicted in green. A 92-bp deletion that is found in pM110\_X3, pM213\_X3, pM216\_X3, pKpN01-NDM7, and pOM26-1 is indicated by the arrow. (B) Evolutionary relationship of fully sequenced IncX3 plasmids harboring *bla*<sub>NDM</sub> as inferred from genetic variances. Encoded NDM variants are shown in parentheses along with geographical origin. The plasmids identified in this study are boxed. pJEG027, pNDM-MGR194, and pKpN01-NDM7 were isolated from *K. pneumoniae* isolates and are shaded gray. pOM26-1 was isolated from an *E. coli* isolate. SNS, single nucleotide substitution.

<https://doi.org/10.1371/journal.pone.0184720.g003>

plasmids, as we found several insertions/deletions and clear traces of genetic mobilization via IS26. pM109\_FII, p214\_FII, and p217\_FII contain a complete transfer operon and were successfully transferred to *E. coli* ML4909 by conjugation. However, a fragment was missing from pM107\_FII (Fig 4A, arrowhead), rendering the transfer operon incompetent.

Concerning the genetic context of *bla*<sub>NDM</sub>, pM109\_FII is distinct from other IncFII Myanmar plasmids, but similar to the *bla*<sub>NDM-1</sub> plasmid pGUE-NDM (Fig 4B). Both plasmids share a 12-kbp resistance-gene region surrounding *bla*<sub>NDM</sub>. In pM109\_FII, an additional gene cassette bracketed by two IS26 sequences containing the class A β-lactamase gene *bla*<sub>TEM-1</sub> and the aminoglycoside resistance-coding gene *rmtB* is located downstream of this region. Interestingly, this gene cassette was also found in the *bla*<sub>NDM</sub> region of other plasmids, including pMC-NDM (Fig 4B). pM109\_FII differs from other IncFII Myanmar plasmids in that it lacks the macrolide-resistance gene *ermB* and the toxin-antitoxin module *pemI-pemK* (Fig 4A and 4B).



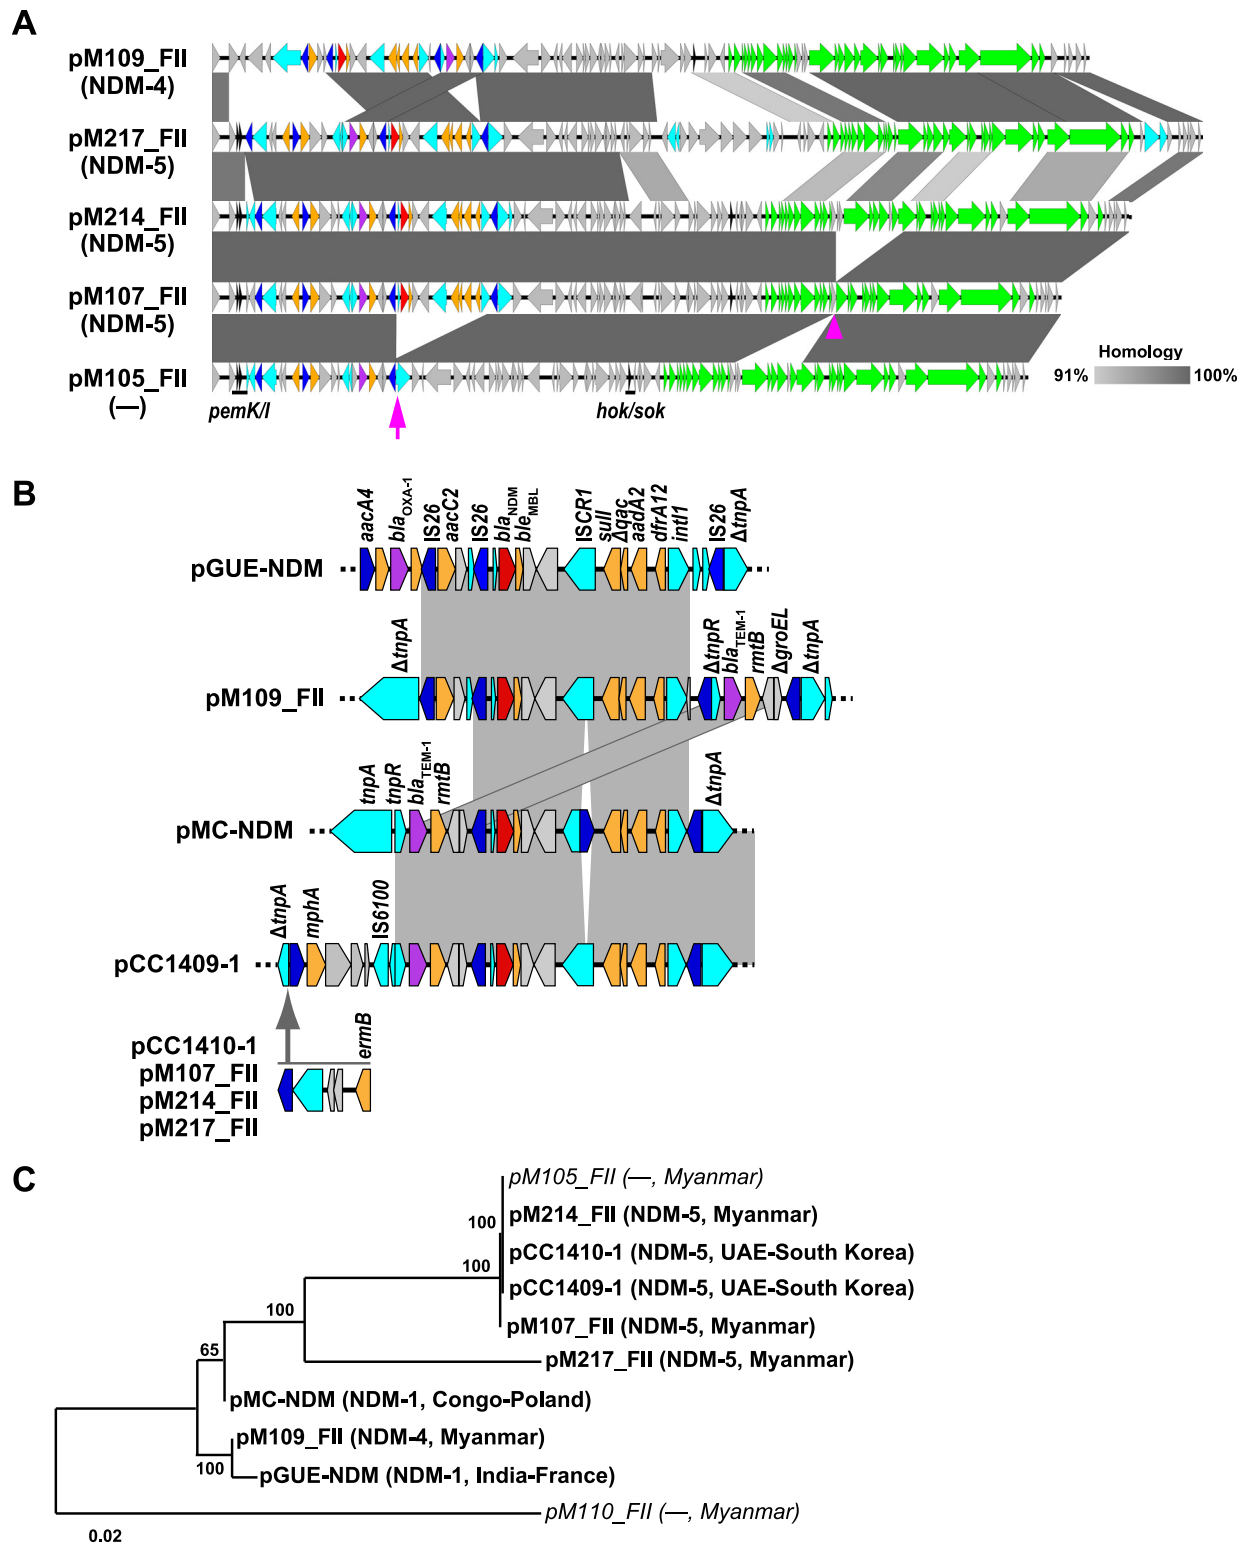

**Fig 4. IncFII plasmids harboring *bla*<sub>NDM</sub>.** (A) Comparison of IncFII plasmids harboring *bla*<sub>NDM</sub> in Myanmar isolates. Homologous regions are shaded gray, with the percent identity shaded according to the color bar. The arrowhead indicates a deletion in pM107\_FII that encompasses several genes involved in conjugal transfer. The arrow indicates a deletion of a gene cluster carrying *bla*<sub>NDM-5</sub> in pM105\_FII. Genes are indicated in colors as defined in Fig 2, except that genes involved in conjugal transfer and toxin-antitoxin

modules are illustrated in green and black, respectively. (B) Schematic representation of the genetic context of bla<sub>NDM</sub>. Identical regions are shaded gray, whereas arrows denote gene-cluster insertions. (C) Maximum-likelihood tree of IncFII plasmids harboring bla<sub>NDM</sub>. Encoded NDM variants are shown in parentheses along with geographical origin. IncFII plasmids lacking bla<sub>NDM</sub> and found in Myanmar isolates were also included and are indicated in italics. Bootstrap support values based on 1000 replications are indicated at the branching points. All the plasmids, except for pCC1409-1 and pCC1410-1, which were identified in *K. pneumoniae* isolates, were isolated from *E. coli*.

<https://doi.org/10.1371/journal.pone.0184720.g004>

pM107\_FII and pM214\_FII clustered with pCC1409-1 and pCC1410-1 in the phylogenetic tree, whereas pM217\_FII was assigned to a different branch (Fig 4C). The transfer operon in the former four plasmids differs slightly from that in other IncFII plasmids, with pM214\_FII and pM217\_FII sharing 81% nucleotide identity in this region. Interestingly, the transfer operon in pM214\_FII is completely identical to that in known plasmids, such as pC15-1a [46]. Therefore, the transfer region in pM214\_FII and related plasmids might be unrelated to other plasmids, possibly as a result of recombination.

Additionally, we found two IncFII plasmids lacking bla<sub>NDM</sub> (pM110\_FII and pM105\_FII). pM110\_FII encodes resistance genes against quinolone and tetracycline and is phylogenetically distinct from other IncFII plasmids harboring β-lactamases and macrolide-resistance genes (Figs 1B and 4C). pM105\_FII, a plasmid identified in strain M105, clustered with the bla<sub>NDM-5</sub>-harboring plasmids pM107\_FII and pM214\_FII. Indeed, pM105\_FII is very similar to pM214\_FII, except for the region surrounding bla<sub>NDM-5</sub> (Fig 4A, arrow), with 99.3% nucleotide identity outside of this region. Therefore, it is likely that pM105\_FII had been encoded previously, but recently lost bla<sub>NDM-5</sub> along with other neighboring genes. This region is bracketed by two IS26 sequences, implying that IS26 was involved in the loss of this fragment [47]. Additionally, the M105 isolate encodes bla<sub>NDM-5</sub> on a multireplicon IncF plasmid designated as pM105\_mF, and, notably, the genetic context of bla<sub>NDM-5</sub> in this plasmid is identical to that in pM214\_FII and related plasmids (Fig 5). Furthermore, the resistance island in pM107\_FII and pM214\_FII bracketed by two IS26 sequences is conserved in pM105\_mF (Fig 5, yellow). This implies that pM105\_mF likely acquired bla<sub>NDM-5</sub> from the pM105\_FII precursor or related IncFII plasmids via IS26.

## Other plasmids

Multiple replicons might broaden the plasmid host range and enable the maintenance of incompatible replicons [24]. To the best of our knowledge, the pM105\_mF plasmid backbone comprising IncFIA-, FIB-, and Q1-replication genes (Fig 1B, designated FIA-FIB-Q1) has not been previously reported. A BLAST search revealed a partial match to pV228-a (Fig 5, dark green), with 99% identity, but query coverage of only 54%. pV228-a, containing IncFIA-, FIB-, and FII-replication genes, has been identified in an *E. coli* strain isolated from a sewage-treatment plant in India [48], and similar multireplicon F plasmids have been found in three other Myanmar isolates (Fig 1B), with one containing an IncFII-replication gene (FIA-FIB-FII-Q1). These plasmids commonly encode several antimicrobial-resistance determinants, such as bla<sub>TEM-1</sub>, and resistance genes against sulphonamide, trimethoprim, and tetracycline. Collectively, these data indicate that multireplicon plasmids with several antimicrobial-resistance genes might be widespread in Myanmar.

Although it is unclear whether the bla<sub>NDM-5</sub> gene cluster was transferred directly from a precursor of pM105\_FII onto pM105\_mF, our findings demonstrated that mobilization of bla<sub>NDM</sub> between plasmids resulted in a novel resistance plasmid. Additionally, the number of antimicrobial-resistance genes in pM105\_mF was higher than that in IncFII plasmids

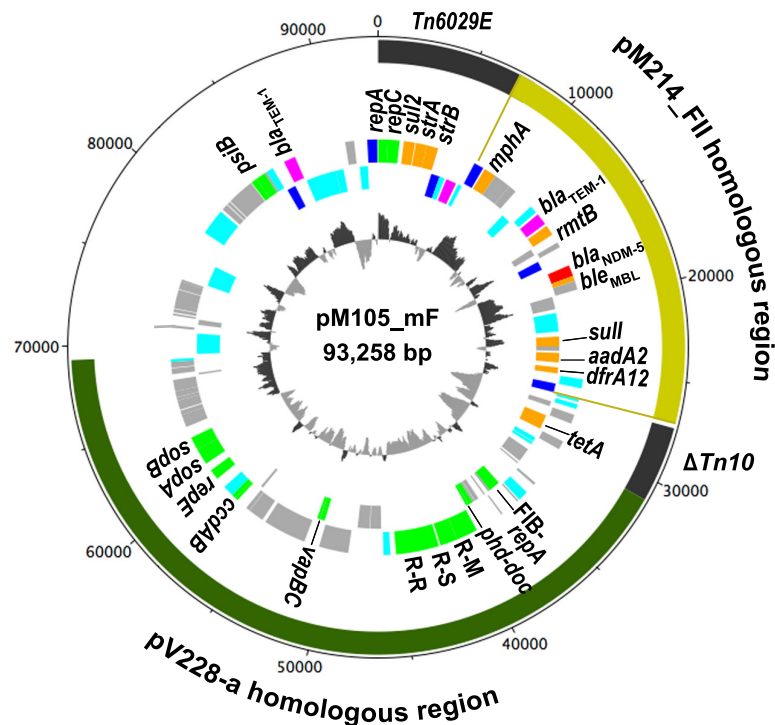

**Fig 5. Circular map of plasmid pM105\_mF.** The outermost circle indicates size in bp. The next circle indicates composite transposons (dark gray) and regions homologous to the *bla*<sub>NDM-5</sub> region in pM214\_FII (yellow) and pV228-a (dark green). The third and fourth circles show coding sequences transcribed clockwise and anti-clockwise, respectively. Genes are indicated in colors as defined in Fig 2, except that genes involved in plasmid replication and maintenance are illustrated in green. R-M, R-S, and R-R denote restriction-modification genes (M, methylase; S, specificity; and R, restriction). The innermost circle shows GC content.

<https://doi.org/10.1371/journal.pone.0184720.g005>

harboring *bla*<sub>NDM-5</sub> (Fig 1B and S1 Table), suggesting that recombination increased the number of resistance genes encoded on the same plasmid as *bla*<sub>NDM</sub>. As shown in Fig 1B, several multidrug-resistant plasmids, such as multireplicon F plasmids, co-exist with *bla*<sub>NDM</sub> plasmids in all isolates. Therefore, clinical settings in Myanmar appear to provide a breeding ground for novel resistance plasmids, and thus require more vigilance from national and local public health authorities.

## Conclusions

We genetically characterized clinical carbapenem-resistant *E. coli* isolates from Myanmar and discovered multiple-resistance plasmids and several NDM variants in the diverse genetic backgrounds of the bacteria, even within the eight isolates examined. These findings suggest dissemination of NDM via multiple introductions and/or prolonged presence in the hospital allowing for recombination and dissemination via horizontal gene transfer into various genetic backgrounds. The situation seems to be similar to that reported in India, where NDM is already endemic and is found not only in healthcare settings, but also in the community [11], [49]. Therefore, further surveillance, including both the hospital and the community, is warranted to understand the dissemination of CRE in Myanmar.

## Supporting information

**S1 Table. Antimicrobial resistance determinants carried by the plasmids identified in *E. coli* clinical isolates in Myanmar.**  
(DOCX)

## Acknowledgments

We are grateful to Yoshikazu Ishii, Masato Suzuki and Mizue Anda for helpful discussion and comments. We also thank Yumi Sasaki and Kazuhiro Maeda for technical assistance on antimicrobial susceptibility testing.

## Author Contributions

**Conceptualization:** Yukihiro Akeda, Kazuhisa Okada, Shigeyuki Hamada.

**Data curation:** Yo Sugawara, Noriko Sakamoto, Dan Takeuchi, Daisuke Motooka, Shota Nakamura.

**Investigation:** Yo Sugawara, Yukihiro Akeda, Noriko Sakamoto, Dan Takeuchi, Hideharu Hagiya, Norihisa Yamamoto, Isao Nishi, Hisao Yoshida, Khwar Nyo Zin, Mya Mya Aye.

**Supervision:** Kazunori Tonomo, Shigeyuki Hamada.

**Writing – original draft:** Yo Sugawara, Yukihiro Akeda.

**Writing – review & editing:** Shigeyuki Hamada.

## References

1. Papp-Wallace KM, Endimiani A, Taracila MA, Bonomo RA. Carbapenems: past, present, and future. *Antimicrob Agents Chemother.* 2011; 55: 4943–4960. <https://doi.org/10.1128/AAC.00296-11> PMID: 21859938
2. Temkin E, Adler A, Lerner A, Carmeli Y. Carbapenem-resistant Enterobacteriaceae: biology, epidemiology, and management. *Ann N Y Acad Sci.* 2014; 1323: 22–42. <https://doi.org/10.1111/nyas.12537> PMID: 25195939
3. Falagas ME, Tansarli GS, Karageorgopoulos DE, Vardakas KZ. Deaths attributable to carbapenem-resistant Enterobacteriaceae infections. *Emerg Infect Dis.* 2014; 20:1170–1175. <https://doi.org/10.3201/eid2007.121004> PMID: 24959688
4. Queenan AM, Bush K. Carbapenemases: the versatile beta-lactamases. *Clin Microbiol Rev.* 2007; 20: 440–458. <https://doi.org/10.1128/CMR.00001-07> PMID: 17630334
5. Logan LK, Weinstein RA. The Epidemiology of Carbapenem-Resistant Enterobacteriaceae: The Impact and Evolution of a Global Menace. *J Infect Dis.* 2017; 215: S28–S36. <https://doi.org/10.1093/infdis/jiw282> PMID: 28375512
6. Myat TO, Hannaway RF, Zin KN, Htike WW, Crump JA, Murdoch DR, et al. ESBL- and Carbapenemase-Producing Enterobacteriaceae in Patients with Bacteremia, Yangon, Myanmar, 2014. *Emerg Infect Dis.* 2017; 23: 857–859. <https://doi.org/10.3201/eid2305.161100> PMID: 28418298
7. Poirel L, Bonnin RA, Boulanger A, Schrenzel J, Kaase M, Nordmann P. Tn125-related acquisition of bla<sub>NDM</sub>-like genes in *Acinetobacter baumannii*. *Antimicrob Agents Chemother.* 2012; 56: 1087–1089. <https://doi.org/10.1128/AAC.05620-11> PMID: 22143526
8. Partridge SR, Iredell JR. Genetic contexts of bla<sub>NDM-1</sub>. *Antimicrob Agents Chemother.* 2012; 56: 6065–6067. <https://doi.org/10.1128/AAC.00117-12> PMID: 23074228
9. Wailan AM, Paterson DL. The spread and acquisition of NDM-1: a multifactorial problem. *Expert Rev Anti Infect Ther.* 2014; 12: 91–115.
10. Dortet L, Poirel L, Nordmann P. Worldwide dissemination of the NDM-type carbapenemases in Gram-negative bacteria. *Biomed Res Int.* 2014; 2014: 249856. <https://doi.org/10.1155/2014/249856> PMID: 24790993

11. Walsh TR, Weeks J, Livermore DM, Toleman MA. Dissemination of NDM-1 positive bacteria in the New Delhi environment and its implications for human health: an environmental point prevalence study. *Lancet Infect Dis*. 2011; 11: 355–362. [https://doi.org/10.1016/S1473-3099\(11\)70059-7](https://doi.org/10.1016/S1473-3099(11)70059-7) PMID: 21478057
12. Hsu LY, Apisarnthanarak A, Khan E, Suwantararat N, Ghafur A, Tambyah PA. Carbapenem-resistant *Acinetobacter baumannii* and *Enterobacteriaceae* in South and Southeast Asia. *Clin Microbiol Rev*. 2017; 30: 1–22. <https://doi.org/10.1128/CMR.00042-16> PMID: 27795305
13. Yamamoto N, Kawahara R, Akeda Y, Shanmugakani RK, Yoshida H, Hagiya H, et al. Development of selective medium for IMP-type carbapenemase-producing *Enterobacteriaceae* in stool specimens. *BMC Infect Dis*. 2017; 17: 229. <https://doi.org/10.1186/s12879-017-2312-1> PMID: 28340557
14. Chin CS, Alexander DH, Marks P, Klammer AA, Drake J, Heiner C, et al. Nonhybrid, finished microbial genome assemblies from long-read SMRT sequencing data. *Nat Methods*. 2013; 10: 563–569. <https://doi.org/10.1038/nmeth.2474> PMID: 23644548
15. Kaas RS, Leekitchareonphon P, Aarestrup FM, Lund O. Solving the problem of comparing whole bacterial genomes across different sequencing platforms. *PLoS One*. 2014; 9: e104984. <https://doi.org/10.1371/journal.pone.0104984> PMID: 25110940
16. Larsen MV, Cosentino S, Rasmussen S, Friis C, Hasman H, Marvig RL, et al. Multilocus sequence typing of total-genome-sequenced bacteria. *J Clin Microbiol*. 2012; 50:1355–1361. <https://doi.org/10.1128/JCM.06094-11> PMID: 22238442
17. Carattoli A, Zankari E, García-Fernández A, Voldby Larsen M, Lund O, Villa L, et al. *In silico* detection and typing of plasmids using PlasmidFinder and plasmid multilocus sequence typing. *Antimicrob Agents Chemother*. 2014; 58: 3895–3903. <https://doi.org/10.1128/AAC.02412-14> PMID: 24777092
18. Zankari E, Hasman H, Cosentino S, Vestergaard M, Rasmussen S, Lund O, et al. Identification of acquired antimicrobial resistance genes. *J Antimicrob Chemother*. 2012; 67: 2640–2644. <https://doi.org/10.1093/jac/dks261> PMID: 22782487
19. Brettin T, Davis JJ, Disz T, Edwards RA, Gerdes S, Olsen GJ, et al. RASTtk: a modular and extensible implementation of the RAST algorithm for building custom annotation pipelines and annotating batches of genomes. *Sci Rep*. 2015; 5: 8365. <https://doi.org/10.1038/srep08365> PMID: 25666585
20. Sugawara H, Ohyama A, Mori H, Kurokawa K. Microbial Genome Annotation Pipeline (MiGAP) for diverse users. In: Abstracts of the 20th International Conference on Genome Informatics, Yokohama, 2009. Abstract p. S001-1-2. Yokohama, Japan: Japanese Society for Bioinformatics, Tokyo, Japan.
21. Sullivan MJ, Petty NK, Beatson SA. Easyfig: a genome comparison visualizer. *Bioinformatics*. 2011; 27: 1009–1010. <https://doi.org/10.1093/bioinformatics/btr039> PMID: 21278367
22. Kumar S, Stecher G, Tamura K. MEGA7: molecular evolutionary genetics analysis version 7.0 for bigger datasets. *Mol Biol Evol*. 2016; 33: 1870–1874. <https://doi.org/10.1093/molbev/msw054> PMID: 27004904
23. Carattoli A, Bertini A, Villa L, Falbo V, Hopkins KL, Threlfall EJ. Identification of plasmids by PCR-based replicon typing. *J Microbiol Methods*. 2005; 63: 219–228. <https://doi.org/10.1016/j.mimet.2005.03.018> PMID: 15935499
24. Villa L, García-Fernández A, Fortini D, Carattoli A. Replicon sequence typing of IncF plasmids carrying virulence and resistance determinants. *J Antimicrob Chemother*. 2010; 65: 2518–2529. <https://doi.org/10.1093/jac/dkq347> PMID: 20935300
25. Johnson TJ, Bielak EM, Fortini D, Hansen LH, Hasman H, Debroy C, et al. Expansion of the IncX plasmid family for improved identification and typing of novel plasmids in drug-resistant *Enterobacteriaceae*. *Plasmid*. 2012; 68: 43–50. <https://doi.org/10.1016/j.plasmid.2012.03.001> PMID: 22470007
26. Inoue M, Itoh J, Mitsuhashi S. pMS76, a plasmid capable of amplification by treatment with chloramphenicol. *Plasmid*. 1983; 9: 86–97. PMID: 6300947
27. Ma L, Ishii Y, Ishiguro M, Matsuzawa H, Yamaguchi K. Cloning and sequencing of the gene encoding Toho-2, a class A beta-lactamase preferentially inhibited by tazobactam. *Antimicrob Agents Chemother*. 1998; 42: 1181–1186. PMID: 9593147
28. Clermont O, Christenson JK, Denamur E, Gordon DM. The Clermont *Escherichia coli* phylo-typing method revisited: improvement of specificity and detection of new phylo-groups. *Environ Microbiol Rep*. 2013; 5: 58–65. <https://doi.org/10.1111/1758-2229.12019> PMID: 23757131
29. Poirel L, Dortet L, Bernabeu S, Nordmann P. Genetic features of bla<sub>NDM-1</sub>-positive *Enterobacteriaceae*. *Antimicrob Agents Chemother*. 2011; 55:5403–5407. <https://doi.org/10.1128/AAC.00585-11> PMID: 21859933
30. Sartor AL, Raza MW, Abbasi SA, Day KM, Perry JD, Paterson DL, et al. Molecular epidemiology of NDM-1-producing *Enterobacteriaceae* and *Acinetobacter baumannii* isolates from Pakistan. *Antimicrob Agents Chemother*. 2014; 58: 5589–5593. <https://doi.org/10.1128/AAC.02425-14> PMID: 24982081

31. Sekizuka T, Matsui M, Yamane K, Takeuchi F, Ohnishi M, Hishinuma A, et al. Complete sequencing of the *bla*<sub>NDM-1</sub>-positive IncA/C plasmid from *Escherichia coli* ST38 isolate suggests a possible origin from plant pathogens. *PLoS One*. 2011; 6: e25334. <https://doi.org/10.1371/journal.pone.0025334> PMID: 21966500
32. Harmer CJ, Hall RM. pRMH760, a precursor of A/C<sub>2</sub> plasmids carrying *bla*<sub>CMY</sub> and *bla*<sub>NDM</sub> genes. *Microb Drug Resist*. 2014; 20:416–423. <https://doi.org/10.1089/mdr.2014.0012> PMID: 24841670
33. Hu H, Hu Y, Pan Y, Liang H, Wang H, Wang X, et al. Novel plasmid and its variant harboring both a *bla*<sub>NDM-1</sub> gene and type IV secretion system in clinical isolates of *Acinetobacter lwoffii*. *Antimicrob Agents Chemother*. 2012; 56: 1698–1702. <https://doi.org/10.1128/AAC.06199-11> PMID: 22290961
34. Chen Z, Li H, Feng J, Li Y, Chen X, Guo X, et al. NDM-1 encoded by a pNDM-BJ01-like plasmid p3SP-NDM in clinical *Enterobacter aerogenes*. *Front Microbiol*. 2015; 6: 294. <https://doi.org/10.3389/fmicb.2015.00294> PMID: 25926823
35. Golebiewski M, Kern-Zdanowicz I, Zienkiewicz M, Adamczyk M, Zylinska J, Baraniak A, et al. Complete nucleotide sequence of the pCTX-M3 plasmid and its involvement in spread of the extended-spectrum beta-lactamase gene *bla*<sub>CTX-M-3</sub>. *Antimicrob Agents Chemother*. 2007; 51: 3789–3795. <https://doi.org/10.1128/AAC.00457-07> PMID: 17698626
36. Del Castillo CS, Hikima J, Jang HB, Nho SW, Jung TS, Wongtavatchai J, et al. Comparative sequence analysis of a multidrug-resistant plasmid from *Aeromonas hydrophila*. *Antimicrob Agents Chemother*. 2013; 57:120–129. <https://doi.org/10.1128/AAC.01239-12> PMID: 23070174
37. Espedido BA, Dimitrijovski B, van Hal SJ, Jensen SO. The use of whole-genome sequencing for molecular epidemiology and antimicrobial surveillance: identifying the role of IncX3 plasmids and the spread of *bla*<sub>NDM-4</sub>-like genes in the Enterobacteriaceae *J Clin Pathol*. 2015; 68:835–838. <https://doi.org/10.1136/jclinpath-2015-203044> PMID: 26056157
38. Krishnaraju M, Kamatchi C, Jha AK, Devasena N, Vennila R, Sumathi G, et al. Complete sequencing of an IncX3 plasmid carrying *bla*<sub>NDM-5</sub> allele reveals an early stage in the dissemination of the *bla*<sub>NDM</sub> gene. *Indian J Med Microbiol*. 2015; 33: 30–38. <https://doi.org/10.4103/0255-0857.148373> PMID: 25559999
39. Chen L, Peirano G, Lynch T, Chavda KD, Gregson DB, Church DL, et al. Molecular characterization by using next-generation sequencing of plasmids containing *bla*<sub>NDM-7</sub> in *Enterobacteriaceae* from Calgary, Canada. *Antimicrob Agents Chemother*. 2015; 60: 1258–1263. <https://doi.org/10.1128/AAC.02661-15> PMID: 26643346
40. Nordmann P, Boulanger AE, Poirel L. NDM-4 metallo-β-lactamase with increased carbapenemase activity from *Escherichia coli*. *Antimicrob Agents Chemother*. 2012; 56: 2184–2186. <https://doi.org/10.1128/AAC.05961-11> PMID: 22252797
41. Cuzon G, Bonnin RA, Nordmann P. First identification of novel NDM carbapenemase, NDM-7, in *Escherichia coli* in France. *PLoS One*. 2013; 8: e61322. <https://doi.org/10.1371/journal.pone.0061322> PMID: 23593461
42. Göttig S, Hamprecht AG, Christ S, Kempf VA, Wichelhaus TA. Detection of NDM-7 in Germany, a new variant of the New Delhi metallo-β-lactamase with increased carbapenemase activity. *J Antimicrob Chemother*. 2013; 68: 1737–1740. <https://doi.org/10.1093/jac/dkt088> PMID: 23557929
43. Bonnin RA, Poirel L, Carattoli A, Nordmann P. Characterization of an IncFII plasmid encoding NDM-1 from *Escherichia coli* ST131. *PLoS One*. 2012; 7: e34752. <https://doi.org/10.1371/journal.pone.0034752> PMID: 22511964
44. Fiett J, Baraniak A, Izdebski R, Sitkiewicz I, Żabicka D, Meler A, et al. The first NDM metallo-β-lactamase-producing *Enterobacteriaceae* isolate in Poland: evolution of IncFII-type plasmids carrying the *bla*<sub>NDM-1</sub> gene. *Antimicrob Agents Chemother*. 2014; 58: 1203–1207. <https://doi.org/10.1128/AAC.01197-13> PMID: 24247128
45. Shin J, Baek JY, Cho SY, Huh HJ, Lee NY, Song JH, et al. *bla*<sub>NDM-5</sub>-bearing IncFII-type plasmids of *Klebsiella pneumoniae* sequence type 147 transmitted by cross-border transfer of a patient. *Antimicrob Agents Chemother*. 2016; 60: 1932–1934. <https://doi.org/10.1128/AAC.02722-15> PMID: 26824953
46. Boyd DA, Tyler S, Christianson S, McGeer A, Muller MP, Willey BM, et al. Complete nucleotide sequence of a 92-kilobase plasmid harboring the CTX-M-15 extended-spectrum beta-lactamase involved in an outbreak in long-term-care facilities in Toronto, Canada. *Antimicrob Agents Chemother*. 2004; 48:3758–3764. <https://doi.org/10.1128/AAC.48.10.3758-3764.2004> PMID: 15388431
47. He S, Hickman AB, Varani AM, Siguier P, Chandler M, Dekker JP, et al. Insertion sequence IS26 reorganizes plasmids in clinically isolated multidrug-resistant bacteria by replicative transposition. *MBio*. 2015; 6: e00762. <https://doi.org/10.1128/mBio.00762-15> PMID: 26060276
48. Akiba M, Sekizuka T, Yamashita A, Kuroda M, Fujii Y, Murata M, et al. Distribution and relationships of antimicrobial resistance determinants among extended-spectrum-cephalosporin-resistant or

carbapenem-resistant *Escherichia coli* isolates from rivers and sewage treatment plants in India. *Antimicrob Agents Chemother.* 2016; 60: 2972–2980. <https://doi.org/10.1128/AAC.01950-15> PMID: [26953207](https://pubmed.ncbi.nlm.nih.gov/26953207/)

49. Rahman M, Shukla SK, Prasad KN, Ovejero CM, Pati BK, Tripathi A, et al. Prevalence and molecular characterisation of New Delhi metallo- $\beta$ -lactamases NDM-1, NDM-5, NDM-6 and NDM-7 in multidrug-resistant Enterobacteriaceae from India. *Int J Antimicrob Agents.* 2014; 44: 30–37. <https://doi.org/10.1016/j.ijantimicag.2014.03.003> PMID: [24831713](https://pubmed.ncbi.nlm.nih.gov/24831713/)
